# Supplementary material for: Molecular Phylogeny of Mobatviruses (Hantaviridae) in Myanmar and Vietnam
Source: PubMed Central journal article supplement (PMC6466252; doi:10.3390/v11030228), 2019-03-07
Supplement: viruses-11-00228-s001.pdf [file viruses-11-00228-s001.pdf]

**Supplemental Table S1. Nucleotide and amino acid sequence similarities of the S segment of newfound mobatviruses in Myanmar and Vietnam.**

S Segment (nt similarity)

| Mobatvirus strain  | LBNV BT20 | LBNV BT33 | LBNV MM4377M17 | LBNV MM4378M18 | XSV VN1982B4 | XSV VN4201B87 | XSV VN2829B3 | XSV N6169VN16-003 | XSV F44580 | XSV F44583 | XSV F44601 | XSV F42640 | XSV F42682 | XSV AR23 | XSV AR18 | XSV PR15 | XSV Dode puerP36 |
|--------------------|-----------|-----------|----------------|----------------|--------------|---------------|--------------|-------------------|------------|------------|------------|------------|------------|----------|----------|----------|------------------|
| LBNV BT20          | –         |           |                |                |              |               |              |                   |            |            |            |            |            |          |          |          |                  |
| LBNV BT33          | 98.9%     | –         |                |                |              |               |              |                   |            |            |            |            |            |          |          |          |                  |
| LBNV MM4377M17     | 96.4%     | 96.8%     | –              |                |              |               |              |                   |            |            |            |            |            |          |          |          |                  |
| LBNV MM4378M18     | 97.2%     | 97.5%     | 99.2%          | –              |              |               |              |                   |            |            |            |            |            |          |          |          |                  |
| XSV VN1982B4       | 71.0%     | 71.0%     | 71.1%          | 71.2%          | –            |               |              |                   |            |            |            |            |            |          |          |          |                  |
| XSV VN4201B87      | 71.1%     | 71.2%     | 72.1%          | 72.0%          | 80.9%        | –             |              |                   |            |            |            |            |            |          |          |          |                  |
| XSV VN2829B3       | 70.0%     | 70.6%     | 70.5%          | 70.6%          | 79.2%        | 84.1%         | –            |                   |            |            |            |            |            |          |          |          |                  |
| XSV VN6169VN16-003 | 69.6%     | 69.6%     | 70.9%          | 70.8%          | 80.6%        | 91.5%         | 83.9%        | –                 |            |            |            |            |            |          |          |          |                  |
| XSV F44580         | 69.9%     | 70.3%     | 70.7%          | 71.1%          | 80.2%        | 85.1%         | 83.4%        | 83.6%             | –          |            |            |            |            |          |          |          |                  |
| XSV F44583         | 70.2%     | 70.5%     | 71.0%          | 71.4%          | 80.3%        | 85.4%         | 83.3%        | 84.0%             | 98.8%      | –          |            |            |            |          |          |          |                  |
| XSV F44601         | 69.9%     | 70.3%     | 70.7%          | 71.1%          | 80.2%        | 85.0%         | 83.3%        | 83.7%             | 99.1%      | 99.3%      | –          |            |            |          |          |          |                  |
| XSV F42640         | 69.6%     | 69.2%     | 69.2%          | 69.4%          | 85.5%        | 78.3%         | 78.9%        | 77.7%             | 80.8%      | 81.0%      | 81.0%      | –          |            |          |          |          |                  |
| XSV F42682         | 71.7%     | 71.5%     | 72.1%          | 72.1%          | 86.3%        | 79.4%         | 79.0%        | 78.7%             | 80.8%      | 81.0%      | 80.9%      | 100.0%     | –          |          |          |          |                  |
| XSV AR23           | 72.1%     | 72.0%     | 72.9%          | 73.1%          | 87.2%        | 79.1%         | 79.0%        | 79.0%             | 81.1%      | 81.2%      | 81.1%      | 90.9%      | 92.1%      | –        |          |          |                  |
| XSV AR18           | 71.9%     | 71.7%     | 72.7%          | 72.8%          | 87.6%        | 78.9%         | 79.2%        | 78.8%             | 80.9%      | 81.0%      | 80.9%      | 91.1%      | 92.1%      | 99.3%    | –        |          |                  |
| XSV PR15           | 71.0%     | 71.3%     | 72.0%          | 72.1%          | 81.0%        | 83.8%         | 84.4%        | 82.6%             | 85.5%      | 85.6%      | 85.2%      | 80.0%      | 81.6%      | 80.8%    | 80.9%    | –        |                  |
| XSV Dode puerP36   | 70.6%     | 71.0%     | 71.9%          | 72.0%          | 80.8%        | 84.4%         | 85.0%        | 83.3%             | 85.7%      | 85.7%      | 85.3%      | 80.4%      | 81.9%      | 80.7%    | 80.8%    | 97.7%    | –                |

NP (amino acid similarity)

| Mobatvirus strain  | LBNV BT20 | LBNV BT33 | LBNV MM4377M17 | LBNV MM4378M18 | XSV VN1982B4 | XSV VN4201B87 | XSV VN2829B3 | XSV VN6169VN16-003 | XSV F44580 | XSV F44583 | XSV F44601 | XSV F42640 | XSV F42682 | XSV AR23 | XSV AR18 | XSV PR15 | XSV Dode puerP36 |
|--------------------|-----------|-----------|----------------|----------------|--------------|---------------|--------------|--------------------|------------|------------|------------|------------|------------|----------|----------|----------|------------------|
| LBNV BT20          | –         |           |                |                |              |               |              |                    |            |            |            |            |            |          |          |          |                  |
| LBNV BT33          | 100.0%    | –         |                |                |              |               |              |                    |            |            |            |            |            |          |          |          |                  |
| LBNV MM4377M17     | 99.0%     | 99.0%     | –              |                |              |               |              |                    |            |            |            |            |            |          |          |          |                  |
| LBNV MM4378M18     | 99.7%     | 99.7%     | 99.2%          | –              |              |               |              |                    |            |            |            |            |            |          |          |          |                  |
| XSV VN1982B4       | 78.3%     | 78.3%     | 78.5%          | 79.0%          | –            |               |              |                    |            |            |            |            |            |          |          |          |                  |
| XSV VN4201B87      | 77.8%     | 77.8%     | 78.0%          | 78.5%          | 94.9%        | –             |              |                    |            |            |            |            |            |          |          |          |                  |
| XSV VN2829B3       | 78.1%     | 78.1%     | 77.5%          | 78.1%          | 93.6%        | 96.1%         | –            |                    |            |            |            |            |            |          |          |          |                  |
| XSV VN6169VN16-003 | 77.3%     | 77.3%     | 77.4%          | 78.0%          | 94.6%        | 99.3%         | 95.2%        | –                  |            |            |            |            |            |          |          |          |                  |
| XSV F44580         | 77.8%     | 77.8%     | 78.0%          | 78.5%          | 97.0%        | 96.3%         | 96.1%        | 96.0%              | –          |            |            |            |            |          |          |          |                  |
| XSV F44583         | 78.0%     | 78.0%     | 78.2%          | 78.7%          | 97.0%        | 96.7%         | 96.5%        | 96.5%              | 99.5%      | –          |            |            |            |          |          |          |                  |
| XSV F44601         | 78.0%     | 78.0%     | 78.2%          | 78.7%          | 97.2%        | 96.5%         | 96.1%        | 96.3%              | 99.8%      | 99.8%      | –          |            |            |          |          |          |                  |
| XSV F42640         | 74.4%     | 74.4%     | 73.3%          | 74.4%          | 99.4%        | 93.0%         | 91.9%        | 91.9%              | 95.9%      | 95.4%      | 95.9%      | –          |            |          |          |          |                  |
| XSV F42682         | 78.3%     | 78.3%     | 78.5%          | 79.0%          | 99.5%        | 94.9%         | 93.6%        | 94.6%              | 97.0%      | 97.0%      | 97.2%      | 100.0%     | –          |          |          |          |                  |
| XSV AR23           | 78.3%     | 78.3%     | 78.5%          | 79.0%          | 99.5%        | 94.9%         | 93.6%        | 94.6%              | 97.0%      | 97.0%      | 97.2%      | 100.0%     | 100.0%     | –        |          |          |                  |
| XSV AR18           | 78.3%     | 78.3%     | 78.5%          | 79.0%          | 99.5%        | 94.9%         | 93.6%        | 94.6%              | 97.0%      | 97.0%      | 97.2%      | 100.0%     | 100.0%     | 100.0%   | –        |          |                  |
| XSV PR15           | 78.3%     | 78.3%     | 78.2%          | 78.7%          | 96.7%        | 96.5%         | 96.5%        | 96.3%              | 98.8%      | 99.3%      | 99.1%      | 95.4%      | 96.7%      | 96.7%    | 96.7%    | –        |                  |
| XSV Dode puerP36   | 78.0%     | 78.0%     | 77.9%          | 78.4%          | 96.5%        | 96.3%         | 96.1%        | 96.0%              | 98.6%      | 99.1%      | 98.8%      | 95.3%      | 96.5%      | 96.5%    | 96.5%    | 99.8%    | –                |

**Supplemental Table S2. Nucleotide and amino acid sequence similarities of the M segment of newfound mobatviruses in Myanmar and Vietnam.**

M Segment (nucleotide similarity)

| Mobatvirus strain  | LBNV BT20 | LBNV BT33 | LBNV MM4377M17 | LBNV MM4378M18 | XSV VN1982B4 | XSV VN4201B87 | XSV VN2829B3 | XSV VN6169VN16-003 | XSV F42682 | XSV F44601 | XSV AR23 | XSV AR18 | XSV PR15 | XSV Dode puerP36 |
|--------------------|-----------|-----------|----------------|----------------|--------------|---------------|--------------|--------------------|------------|------------|----------|----------|----------|------------------|
| LBNV BT20          | –         |           |                |                |              |               |              |                    |            |            |          |          |          |                  |
| LBNV BT33          | 98.6%     | –         |                |                |              |               |              |                    |            |            |          |          |          |                  |
| LBNV MM4377M17     | 96.5%     | 97.3%     | –              |                |              |               |              |                    |            |            |          |          |          |                  |
| LBNV MM4378M18     | 96.4%     | 97.2%     | 99.9%          | –              |              |               |              |                    |            |            |          |          |          |                  |
| XSV VN1982B4       | 68.1%     | 68.2%     | 68.2%          | 68.3%          | –            |               |              |                    |            |            |          |          |          |                  |
| XSV VN4201B87      | 67.7%     | 67.8%     | 67.7%          | 67.8%          | 79.7%        | –             |              |                    |            |            |          |          |          |                  |
| XSV VN2829B3       | 70.8%     | 70.7%     | 70.8%          | 70.8%          | 81.2%        | 84.3%         | –            |                    |            |            |          |          |          |                  |
| XSV VN6169VN16-003 | 67.7%     | 68.3%     | 68.8%          | 68.9%          | 80.6%        | 89.3%         | 83.6%        | –                  |            |            |          |          |          |                  |
| XSV F42682         | 71.2%     | 71.6%     | 71.6%          | 71.8%          | 86.6%        | 80.8%         | 80.5%        | 83.0%              | –          |            |          |          |          |                  |
| XSV F44601         | 71.0%     | 70.6%     | 70.1%          | 70.3%          | 80.2%        | 82.4%         | 83.1%        | 84.6%              | 79.6%      | –          |          |          |          |                  |
| XSV AR23           | 68.7%     | 68.8%     | 68.4%          | 68.5%          | 86.8%        | 79.7%         | 81.5%        | 80.6%              | 93.4%      | 80.5%      | –        |          |          |                  |
| XSV AR18           | 68.6%     | 68.7%     | 68.4%          | 68.6%          | 86.7%        | 79.8%         | 81.5%        | 80.6%              | 93.4%      | 80.5%      | 99.2%    | –        |          |                  |
| XSV PR15           | 68.3%     | 68.4%     | 68.6%          | 68.8%          | 80.0%        | 83.9%         | 85.1%        | 83.4%              | 79.6%      | 83.3%      | 79.6%    | 79.5%    | –        |                  |
| XSV Dode puerP36   | 70.1%     | 70.1%     | 70.5%          | 70.5%          | 80.6%        | 84.3%         | 85.1%        | 85.0%              | 80.1%      | 83.7%      | 79.9%    | 79.9%    | 97.7%    | –                |

GP (amino acid similarity)

| Mobatvirus strain  | LBNV BT20 | LBNV BT33 | LBNV MM4377 | LBNV MM4378 | XSV VN1982B4 | XSV VN4201B87 | XSV VN2829B3 | XSV VN6169VN16-003 | XSV F42682 | XSV F44601 | XSV AR23 | XSV AR18 | XSV PR15 | XSV Dode puerP36 |
|--------------------|-----------|-----------|-------------|-------------|--------------|---------------|--------------|--------------------|------------|------------|----------|----------|----------|------------------|
| LBNV BT20          | –         |           |             |             |              |               |              |                    |            |            |          |          |          |                  |
| LBNV BT33          | 99.2%     | –         |             |             |              |               |              |                    |            |            |          |          |          |                  |
| LBNV MM4377        | 99.0%     | 99.5%     | –           |             |              |               |              |                    |            |            |          |          |          |                  |
| LBNV MM4378        | 99.2%     | 99.6%     | 99.9%       | –           |              |               |              |                    |            |            |          |          |          |                  |
| XSV VN1982B4       | 71.9%     | 72.1%     | 72.2%       | 72.5%       | –            |               |              |                    |            |            |          |          |          |                  |
| XSV VN4201B87      | 71.3%     | 71.5%     | 71.9%       | 72.2%       | 92.9%        | –             |              |                    |            |            |          |          |          |                  |
| XSV VN2829B3       | 74.1%     | 74.3%     | 74.3%       | 74.3%       | 94.4%        | 95.5%         | –            |                    |            |            |          |          |          |                  |
| XSV VN6169VN16-003 | 70.8%     | 71.2%     | 71.2%       | 71.2%       | 93.1%        | 97.3%         | 92.1%        | –                  |            |            |          |          |          |                  |
| XSV F42682         | 73.3%     | 74.7%     | 74.7%       | 74.7%       | 97.3%        | 95.5%         | 94.1%        | 96.0%              | –          |            |          |          |          |                  |
| XSV F44601         | 73.8%     | 74.2%     | 74.2%       | 74.2%       | 96.8%        | 96.8%         | 95.5%        | 96.0%              | 96.8%      | –          |          |          |          |                  |
| XSV AR23           | 71.9%     | 72.3%     | 72.4%       | 72.6%       | 97.1%        | 92.9%         | 93.6%        | 94.6%              | 100.0%     | 96.8%      | –        |          |          |                  |
| XSV AR18           | 71.8%     | 72.2%     | 72.3%       | 72.6%       | 96.9%        | 92.8%         | 93.6%        | 94.6%              | 100.0%     | 96.8%      | 99.7%    | –        |          |                  |
| XSV PR15           | 72.1%     | 72.3%     | 72.4%       | 72.5%       | 93.7%        | 95.8%         | 95.9%        | 94.6%              | 95.9%      | 98.6%      | 93.5%    | 93.6%    | –        |                  |
| XSV Dode puerP36   | 74.1%     | 74.4%     | 74.4%       | 74.4%       | 94.8%        | 95.8%         | 95.5%        | 95.8%              | 96.4%      | 99.1%      | 94.5%    | 94.5%    | 99.3%    | –                |

**Supplemental Table S3.**

L Segment (nucleotide similarity)

| Mobatvirus strains | LAIV BT20 | LAIV BT33 | LAIV MM4377 M17 | LAIV MM4378 M18 | XSV VN1982 B4 | XSV VN4201 B87 | XSV VN2829 B3 | XSV VN6169 VN16-003 | XSV MM4398 M38 | XSV MM4425 M65 | XSV F44580 | XSV F44583 | XSV F44601 | XSV F42640 | XSV F42682 | XSV AR23 | XSV AR18 | XSV PR15 | XSV Dode puerP36 |   |
|--------------------|-----------|-----------|-----------------|-----------------|---------------|----------------|---------------|---------------------|----------------|----------------|------------|------------|------------|------------|------------|----------|----------|----------|------------------|---|
| LAIV BT20          | –         |           |                 |                 |               |                |               |                     |                |                |            |            |            |            |            |          |          |          |                  |   |
| LAIV BT33          | 98.6%     | –         |                 |                 |               |                |               |                     |                |                |            |            |            |            |            |          |          |          |                  |   |
| LAIV MM4377M17     | 97.1%     | 96.9%     | –               |                 |               |                |               |                     |                |                |            |            |            |            |            |          |          |          |                  |   |
| LAIV MM4378M18     | 97.0%     | 96.9%     | 99.8%           | –               |               |                |               |                     |                |                |            |            |            |            |            |          |          |          |                  |   |
| XSV VN1982B4       | 72.4%     | 72.6%     | 72.4%           | 72.4%           | –             |                |               |                     |                |                |            |            |            |            |            |          |          |          |                  |   |
| XSV VN4201B87      | 72.1%     | 72.0%     | 72.4%           | 72.5%           | 79.0%         | –              |               |                     |                |                |            |            |            |            |            |          |          |          |                  |   |
| XSV VN2829B3       | 72.9%     | 72.7%     | 72.8%           | 72.7%           | 80.6%         | 84.4%          | –             |                     |                |                |            |            |            |            |            |          |          |          |                  |   |
| XSV VN6169VN16-003 | 69.9%     | 69.5%     | 70.0%           | 70.0%           | 78.0%         | 88.6%          | 83.2%         | –                   |                |                |            |            |            |            |            |          |          |          |                  |   |
| XSV MM4398M38      | 71.9%     | 71.6%     | 71.9%           | 72.2%           | 77.6%         | 85.6%          | 83.7%         | 82.4%               | –              |                |            |            |            |            |            |          |          |          |                  |   |
| XSV MM4425M65      | 72.2%     | 71.9%     | 72.2%           | 71.9%           | 78.0%         | 83.2%          | 82.5%         | 81.2%               | 94.1%          | –              |            |            |            |            |            |          |          |          |                  |   |
| XSV F44580         | 73.6%     | 73.5%     | 73.6%           | 73.7%           | 81.3%         | 83.3%          | 83.0%         | 81.9%               | 81.4%          | 80.3%          | –          |            |            |            |            |          |          |          |                  |   |
| XSV F44583         | 75.4%     | 75.2%     | 75.1%           | 75.2%           | 81.6%         | 83.6%          | 83.7%         | 82.1%               | 81.3%          | 81.3%          | 97.8%      | –          |            |            |            |          |          |          |                  |   |
| XSV F44601         | 75.3%     | 75.4%     | 75.2%           | 75.3%           | 81.1%         | 83.1%          | 83.7%         | 81.4%               | 80.6%          | 80.6%          | 97.6%      | 98.5%      | –          |            |            |          |          |          |                  |   |
| XSV F42640         | 72.0%     | 72.8%     | 72.4%           | 72.6%           | 83.8%         | 79.4%          | 78.9%         | 79.5%               | 78.2%          | 77.2%          | 80.7%      | 80.6%      | 80.7%      | –          |            |          |          |          |                  |   |
| XSV F42682         | 74.9%     | 74.9%     | 74.9%           | 75.0%           | 85.9%         | 80.3%          | 80.1%         | 79.0%               | 78.0%          | 76.8%          | 80.3%      | 81.0%      | 80.9%      | 99.7%      | –          |          |          |          |                  |   |
| XSV AR23           | 72.6%     | 72.6%     | 72.6%           | 72.6%           | 85.8%         | 79.5%          | 80.2%         | 78.0%               | 77.6%          | 78.8%          | 81.0%      | 81.7%      | 81.7%      | 93.1%      | 92.6%      | –        |          |          |                  |   |
| XSV AR18           | 72.4%     | 72.4%     | 72.4%           | 72.4%           | 85.8%         | 79.5%          | 80.1%         | 77.9%               | 77.4%          | 79.1%          | 80.7%      | 81.4%      | 81.3%      | 92.5%      | 92.0%      | 99.3%    | –        |          |                  |   |
| XSV PR15           | 72.4%     | 72.5%     | 72.7%           | 72.7%           | 79.3%         | 83.6%          | 83.4%         | 82.1%               | 91.1%          | 89.9%          | 83.3%      | 83.0%      | 82.8%      | 79.9%      | 80.0%      | 79.5%    | 79.5%    | –        |                  |   |
| XSV Dode puerP36   | 73.9%     | 74.0%     | 74.2%           | 74.2%           | 80.2%         | 84.0%          | 84.1%         | 82.3%               | 90.8%          | 89.1%          | 82.3%      | 82.2%      | 82.0%      | 79.5%      | 80.6%      | 80.0%    | 80.0%    | 80.0%    | 97.7%            | – |

LP (amino acid similarity)

| Mobatvirus strains | LAIV BT20 | LAIV BT33 | LAIV MM4377 M17 | LAIV MM4378 M18 | XSV VN1982 B4 | XSV VN4201 B87 | XSV VN2829 B3 | XSV VN6169 VN16-003 | XSV MM4398 M38 | XSV MM4425 M65 | XSV F44580 | XSV F44583 | XSV F44601 | XSV F42640 | XSV F42682 | XSV AR23 | XSV AR18 | XSV PR15 | XSV Dode puerP36 |
|--------------------|-----------|-----------|-----------------|-----------------|---------------|----------------|---------------|---------------------|----------------|----------------|------------|------------|------------|------------|------------|----------|----------|----------|------------------|
| LAIV BT20          | –         |           |                 |                 |               |                |               |                     |                |                |            |            |            |            |            |          |          |          |                  |
| LAIV BT33          | 99.7%     | –         |                 |                 |               |                |               |                     |                |                |            |            |            |            |            |          |          |          |                  |
| LAIV MM4377M17     | 99.4%     | 99.4%     | –               |                 |               |                |               |                     |                |                |            |            |            |            |            |          |          |          |                  |
| LAIV MM4378M18     | 99.4%     | 99.4%     | 99.6%           | –               |               |                |               |                     |                |                |            |            |            |            |            |          |          |          |                  |
| XSV VN1982B4       | 80.5%     | 80.5%     | 80.6%           | 80.6%           | –             |                |               |                     |                |                |            |            |            |            |            |          |          |          |                  |
| XSV VN4201B87      | 80.9%     | 80.8%     | 80.9%           | 80.9%           | 94.1%         | –              |               |                     |                |                |            |            |            |            |            |          |          |          |                  |
| XSV VN2829B3       | 80.6%     | 80.6%     | 80.7%           | 80.7%           | 93.5%         | 96.5%          | –             |                     |                |                |            |            |            |            |            |          |          |          |                  |
| XSV VN6169VN16-003 | 75.7%     | 75.4%     | 75.6%           | 75.5%           | 91.2%         | 98.0%          | 94.7%         | –                   |                |                |            |            |            |            |            |          |          |          |                  |
| XSV MM4398M38      | 81.4%     | 80.5%     | 81.4%           | 81.4%           | 94.9%         | 96.6%          | 97.5%         | 95.6%               | –              |                |            |            |            |            |            |          |          |          |                  |
| XSV MM4425M65      | 81.4%     | 80.5%     | 81.4%           | 81.4%           | 94.9%         | 96.6%          | 97.5%         | 95.6%               | 100.0%         | –              |            |            |            |            |            |          |          |          |                  |
| XSV F44580         | 85.1%     | 84.3%     | 85.1%           | 85.1%           | 94.0%         | 97.0%          | 97.0%         | 96.9%               | 97.5%          | 97.5%          | –          |            |            |            |            |          |          |          |                  |
| XSV F44583         | 87.6%     | 87.1%     | 87.6%           | 87.6%           | 95.9%         | 97.9%          | 97.9%         | 97.2%               | 97.5%          | 97.5%          | 99.6%      | –          |            |            |            |          |          |          |                  |
| XSV F44601         | 87.8%     | 87.3%     | 87.8%           | 87.8%           | 96.1%         | 97.9%          | 97.9%         | 97.2%               | 97.5%          | 97.5%          | 99.6%      | 99.7%      | –          |            |            |          |          |          |                  |
| XSV F42640         | 81.5%     | 80.4%     | 81.5%           | 81.5%           | 99.5%         | 95.8%          | 95.8%         | 94.9%               | 94.9%          | 94.9%          | 93.7%      | 93.7%      | 93.7%      | –          |            |          |          |          |                  |
| XSV F42682         | 86.3%     | 85.8%     | 86.3%           | 86.3%           | 99.5%         | 96.6%          | 96.6%         | 94.9%               | 94.9%          | 94.9%          | 94.0%      | 95.6%      | 95.9%      | 100.0%     | –          |          |          |          |                  |
| XSV AR23           | 80.8%     | 80.8%     | 80.9%           | 80.9%           | 97.7%         | 93.9%          | 93.4%         | 91.1%               | 94.9%          | 94.9%          | 94.0%      | 95.9%      | 96.1%      | 100.0%     | 99.7%      | –        |          |          |                  |
| XSV AR18           | 80.8%     | 80.8%     | 80.9%           | 80.9%           | 97.6%         | 93.9%          | 93.4%         | 91.2%               | 94.9%          | 94.9%          | 94.0%      | 95.3%      | 95.6%      | 100.0%     | 99.2%      | 99.6%    | –        |          |                  |
| XSV PR15           | 80.8%     | 80.8%     | 80.8%           | 80.9%           | 94.6%         | 97.3%          | 96.6%         | 95.4%               | 100.0%         | 100.0%         | 97.0%      | 98.2%      | 97.9%      | 95.8%      | 96.9%      | 94.4%    | 94.4%    | –        |                  |
| XSV Dode puerP36   | 84.3%     | 84.2%     | 84.2%           | 84.3%           | 95.9%         | 97.8%          | 97.4%         | 95.8%               | 99.2%          | 99.2%          | 97.4%      | 98.5%      | 98.2%      | 96.3%      | 97.2%      | 95.7%    | 95.7%    | 99.5%    | –                |

**Supplemental Table S4. Gene accession numbers of cytochrome b (Cyt b) and cytochrome oxidase subunit 1 (COI) sequences.**

| Order         | Family          | Species                            | Clone            | Country     | Cyt b    | COI          |   |
|---------------|-----------------|------------------------------------|------------------|-------------|----------|--------------|---|
| Macroscelidea | Macroscelididae | <i>Elephantulus edwardii</i>       |                  |             | DQ901019 | NW_006399889 |   |
| Macroscelidea | Macroscelididae | <i>Elephantulus intufi</i>         |                  |             | DQ901206 |              |   |
| Macroscelidea | Macroscelididae | <i>Elephantulus rupestris</i>      |                  |             | DQ901201 |              |   |
| Macroscelidea | Macroscelididae | <i>Elephantulus sp</i>             |                  |             |          | AB096867     |   |
| Chiroptera    | Emballonuridae  | <i>Emballonura alecto</i>          |                  | Philippines | MK064108 | MK410361     | * |
| Chiroptera    | Emballonuridae  | <i>Taphozous longimanus</i>        | MM3177B10        | Myanmar     | KX458068 | MK410381     | * |
| Chiroptera    | Emballonuridae  | <i>Taphozous melanopogon</i>       | MM4366M6         | Myanmar     | MK410325 | * MK410404   | * |
| Chiroptera    | Emballonuridae  | <i>Taphozous melanopogon</i>       | MM4367M7         | Myanmar     | MK410326 | * MK410405   | * |
| Chiroptera    | Emballonuridae  | <i>Taphozous melanopogon</i>       | MM4368M8         | Myanmar     | MK410327 | * MK410406   | * |
| Chiroptera    | Emballonuridae  | <i>Taphozous melanopogon</i>       | MM4369M9         | Myanmar     | MK410328 | * MK410407   | * |
| Chiroptera    | Emballonuridae  | <i>Taphozous melanopogon</i>       | MM4370M10        | Myanmar     | MK410329 | * MK410408   | * |
| Chiroptera    | Emballonuridae  | <i>Taphozous melanopogon</i>       | MM4371M11        | Myanmar     | MK410330 | * MK410409   | * |
| Chiroptera    | Emballonuridae  | <i>Taphozous melanopogon</i>       | MM4372M12        | Myanmar     | MK410331 | * MK410410   | * |
| Chiroptera    | Emballonuridae  | <i>Taphozous melanopogon</i>       | MM4373M13        | Myanmar     | MK410332 | * MK410411   | * |
| Chiroptera    | Emballonuridae  | <i>Taphozous melanopogon</i>       | MM4374M14        | Myanmar     | MK410333 | * MK410412   | * |
| Chiroptera    | Emballonuridae  | <i>Taphozous melanopogon</i>       | MM4375M15        | Myanmar     | MK410334 | * MK410413   | * |
| Chiroptera    | Emballonuridae  | <i>Taphozous melanopogon</i>       | MM4376M16        | Myanmar     | MK410335 | * MK410414   | * |
| Chiroptera    | Emballonuridae  | <i>Taphozous melanopogon</i>       | MM4377M17        | Myanmar     | LC406449 | MK410415     | * |
| Chiroptera    | Emballonuridae  | <i>Taphozous melanopogon</i>       | MM4378M18        | Myanmar     | MK064111 | * MK410416   | * |
| Chiroptera    | Emballonuridae  | <i>Taphozous melanopogon</i>       | MM4389M29        | Myanmar     | MK410338 | * MK410417   | * |
| Chiroptera    | Emballonuridae  | <i>Taphozous melanopogon</i>       | MM4390M30        | Myanmar     | MK410339 | * MK410418   | * |
| Chiroptera    | Emballonuridae  | <i>Taphozous melanopogon</i>       | ROM MAM110983    | Vietnam     |          | HM541973     |   |
| Chiroptera    | Emballonuridae  | <i>Taphozous melanopogon</i>       | ROM MAM110984    | Vietnam     |          | HM541972     |   |
| Chiroptera    | Emballonuridae  | <i>Taphozous melanopogon</i>       | YN-25            | China       | MG570075 |              |   |
| Chiroptera    | Emballonuridae  | <i>Taphozous melanopogon</i>       | ROM MAM111014    |             | EF584220 |              |   |
| Chiroptera    | Emballonuridae  | <i>Taphozous melanopogon</i>       | ROM MAM110979    | Vietnam     | EF584221 |              |   |
| Chiroptera    | Emballonuridae  | <i>Taphozous sp.</i>               | CS-2014          | India       |          | KM069434     |   |
| Chiroptera    | Emballonuridae  | <i>Taphozous hildegardeae</i>      |                  | Kenya       |          | JF442692     |   |
| Chiroptera    | Hipposideridae  | <i>Aselliscus stoliczkanus</i>     |                  | Vietnam     | KU161570 | LC406447     |   |
| Chiroptera    | Hipposideridae  | <i>Aselliscus dongbacana</i>       |                  | Vietnam     | MG524933 | * LC406434   |   |
| Chiroptera    | Hipposideridae  | <i>Hipposideros cineraceus</i>     | VN2829B3         | Vietnam     | LC406452 | MK410375     | * |
| Chiroptera    | Hipposideridae  | <i>Hipposideros cineraceus</i>     | VN2830B4         | Vietnam     | LC406453 | MK410376     | * |
| Chiroptera    | Hipposideridae  | <i>Hipposideros cineraceus</i>     | VN2939B97        | Vietnam     | LC406454 | MK410378     | * |
| Chiroptera    | Hipposideridae  | <i>Hipposideros cineraceus</i>     | VN3473B43        | Vietnam     | LC406455 | MK410389     | * |
| Chiroptera    | Hipposideridae  | <i>Hipposideros cineraceus</i>     | VN3487B57        | Vietnam     | LC406456 | MK410390     | * |
| Chiroptera    | Hipposideridae  | <i>Hipposideros cineraceus</i>     | VN4142B28        | Vietnam     | MK091935 | MK410396     | * |
| Chiroptera    | Hipposideridae  | <i>Hipposideros cineraceus</i>     | VN4188B74        | Vietnam     | MK091936 | MK410402     | * |
| Chiroptera    | Hipposideridae  | <i>Hipposideros cineraceus</i>     | VN4201B87        | Vietnam     | KX458067 | MK410403     | * |
| Chiroptera    | Hipposideridae  | <i>Hipposideros cineraceus</i>     | VN6169VN16-003   | Vietnam     | MK410352 | * MK410431   | * |
| Chiroptera    | Hipposideridae  | <i>Hipposideros pomona</i> clade 1 | VN1982B4         | Vietnam     | JX912954 | MK410367     | * |
| Chiroptera    | Hipposideridae  | <i>Hipposideros pomona</i> clade 1 | VN2014XS22       | Vietnam     | MK091937 | MK410369     | * |
| Chiroptera    | Hipposideridae  | <i>Hipposideros pomona</i> clade 1 | VN2016XS24       | Vietnam     | MK091938 | MK410370     | * |
| Chiroptera    | Hipposideridae  | <i>Hipposideros pomona</i> clade 1 | KF2583B290613-7  | Vietnam     | MK091939 | MK410372     | * |
| Chiroptera    | Hipposideridae  | <i>Hipposideros pomona</i> clade 1 | KF2589B290613-13 | Vietnam     | MK091940 | MK410373     | * |
| Chiroptera    | Hipposideridae  | <i>Hipposideros pomona</i> clade 1 | VN3457B27        | Vietnam     | MK091944 | MK410387     | * |
| Chiroptera    | Hipposideridae  | <i>Hipposideros pomona</i> clade 1 | VN3458B28        | Vietnam     | MK091945 | MK410388     | * |
| Chiroptera    | Hipposideridae  | <i>Hipposideros pomona</i> clade 1 | VN3498B68        | Vietnam     | MK091946 | MK410391     | * |
| Chiroptera    | Hipposideridae  | <i>Hipposideros pomona</i> clade 1 | VN4116B2         | Vietnam     | MK091947 | MK410394     | * |
| Chiroptera    | Hipposideridae  | <i>Hipposideros pomona</i> clade 1 | VN4137B23        | Vietnam     | MK091948 | MK410395     | * |
| Chiroptera    | Hipposideridae  | <i>Hipposideros pomona</i> clade 1 | VN4152B38        | Vietnam     | MK091949 | MK410397     | * |
| Chiroptera    | Hipposideridae  | <i>Hipposideros pomona</i> clade 1 | MM4398M38        | Vietnam     | MK064112 | MK410419     | * |
| Chiroptera    | Hipposideridae  | <i>Hipposideros pomona</i> clade 1 | MM4425M65        | Vietnam     | MK064113 | MK410420     | * |
| Chiroptera    | Hipposideridae  | <i>Hipposideros pomona</i> clade 1 | VN6105VN15-003   | Vietnam     | MK410344 | * MK410424   | * |

|              |                  |                                    |                |                |          |   |             |   |
|--------------|------------------|------------------------------------|----------------|----------------|----------|---|-------------|---|
| Chiroptera   | Hipposideridae   | <i>Hipposideros pomona</i> clade 1 | VN6124VN15-022 | Vietnam        | MK410345 | * | MK410425    | * |
| Chiroptera   | Hipposideridae   | <i>Hipposideros pomona</i> clade 1 | VN6170VN16-004 | Vietnam        | MK410353 | * | MK410432    | * |
| Chiroptera   | Hipposideridae   | <i>Hipposideros pomona</i> clade 1 | VN6168VN16-002 | Vietnam        | MK430029 | * | MK430032    | * |
| Chiroptera   | Hipposideridae   | <i>Hipposideros pomona</i> clade 1 | ROM MAM107660  | Vietnam        |          |   | ABRVN141-06 | * |
| Chiroptera   | Hipposideridae   | <i>Hipposideros pomona</i> clade 1 | ROM MAM107700  | Vietnam        |          |   | ABRVN175-06 | * |
| Chiroptera   | Hipposideridae   | <i>Hipposideros pomona</i> clade 2 | VN2911B70      | Vietnam        | MK091941 |   | MK410377    | * |
| Chiroptera   | Hipposideridae   | <i>Hipposideros pomona</i> clade 2 | VN2942B100     | Vietnam        | MK091942 |   | MK410379    | * |
| Chiroptera   | Hipposideridae   | <i>Hipposideros pomona</i> clade 2 | VN2963B121     | Vietnam        | MK091943 |   | MK410380    | * |
| Chiroptera   | Hipposideridae   | <i>Hipposideros pomona</i> clade 2 | ROM MAM 111350 | Vietnam        |          |   | ABRVN532-06 | * |
| Chiroptera   | Hipposideridae   | <i>Hipposideros pomona</i> clade 2 | ROM MAM 111371 | Vietnam        |          |   | ABRVN549-06 | * |
| Chiroptera   | Hipposideridae   | <i>Hipposideros pomona</i> clade 3 | VN6154VN15-052 | Vietnam        | MK410347 | * | MK410426    | * |
| Chiroptera   | Hipposideridae   | <i>Hipposideros pomona</i> clade 3 | VN6162VN15-060 | Vietnam        | MK410348 | * | MK410427    | * |
| Chiroptera   | Hipposideridae   | <i>Hipposideros pomona</i> clade 3 | VN6163VN15-061 | Vietnam        | MK410349 | * | MK410428    | * |
| Chiroptera   | Hipposideridae   | <i>Hipposideros pomona</i> clade 3 | VN6165VN15-063 | Vietnam        | MK410350 | * | MK410429    | * |
| Chiroptera   | Hipposideridae   | <i>Hipposideros pomona</i> clade 3 | VN6166VN15-064 | Vietnam        | MK410351 | * | MK410430    | * |
| Chiroptera   | Hipposideridae   | <i>Hipposideros pomona</i> clade 3 | VN6164VN15-062 | Vietnam        | MK430028 | * | MK430031    | * |
| Chiroptera   | Hipposideridae   | <i>Hipposideros ruber</i>          |                |                | EU934474 |   |             |   |
| Chiroptera   | Molossidae       | <i>Tadarida insignis</i>           |                | Japan          | MK410320 | * | MK410371    | * |
| Chiroptera   | Pteropodidae     | <i>Cynopterus sphinx</i>           |                | Vietnam        | MK064110 |   | MK410368    | * |
| Chiroptera   | Pteropodidae     | <i>Rousettus amplexicaudatus</i>   |                | Philippines    | KU950716 |   | MK410365    | * |
| Chiroptera   | Rhinolophidae    | <i>Rhinolophus affinis</i>         |                | China          | JX465358 |   | MK410386    | * |
| Chiroptera   | Rhinolophidae    | <i>Rhinolophus thomasi</i>         |                | Myanmar        |          |   | MK410385    | * |
| Chiroptera   | Rhinolophidae    | <i>Rhinolophus sinicus</i>         |                | China          | JX465362 |   |             |   |
| Chiroptera   | Rhinolophidae    | <i>Rhinolophus monoceros</i>       |                | China          | JX465359 |   |             |   |
| Chiroptera   | Vespertilionidae | <i>Miniopterus schreibersi</i>     |                | Philippines    | MK064109 |   | MK410364    | * |
| Chiroptera   | Vespertilionidae | <i>Plecotus ognevi</i>             |                | Mongolia       |          |   | MK410363    | * |
| Chiroptera   | Vespertilionidae | <i>Nyctalus noctula</i>            |                | Czech Republic | JX570902 |   | KP273590    |   |
| Chiroptera   | Vespertilionidae | <i>Neoromicia nanus</i>            |                | Côte d'Ivoire  | EU797428 |   | JF444201    |   |
| Chiroptera   | Vespertilionidae | <i>Pipistrellus abramus</i>        |                | China          | JX465352 |   |             |   |
| Chiroptera   | Nycteridae       | <i>Nycteris hispida</i>            |                |                | HQ693722 |   | JF442542    |   |
| Chiroptera   | Nycteridae       | <i>Nycteris tragata</i>            |                | Malaysia       |          |   | HM541174    |   |
| Eulipotyphla | Soricidae        | <i>Anourosorex yamashinai</i>      |                | Taiwan         |          |   | MK410358    | * |
| Eulipotyphla | Soricidae        | <i>Anourosorex squamipe</i>        |                | Thailand       | AB175090 |   |             |   |
| Eulipotyphla | Soricidae        | <i>Blarina brevicauda</i>          |                | United States  | MK410313 | * | MK410357    | * |
| Eulipotyphla | Soricidae        | <i>Chimarrogale platycephala</i>   |                | Japan          |          |   | MK410360    | * |
| Eulipotyphla | Soricidae        | <i>Crocidura lasiura</i>           |                | South Korea    | KJ004674 |   | MK410355    | * |
| Eulipotyphla | Soricidae        | <i>Crocidura shantungensis</i>     |                | South Korea    | HQ663932 |   | MK410356    | * |
| Eulipotyphla | Soricidae        | <i>Crocidura obscurior</i>         |                | Cote d'Ivoire  | KC684096 |   |             |   |
| Eulipotyphla | Soricidae        | <i>Crocidura theresae</i>          |                | Burkina Faso   | DQ521043 |   |             |   |
| Eulipotyphla | Soricidae        | <i>Crocidura douceti</i>           |                | Guinea         | KC684929 |   |             |   |
| Eulipotyphla | Soricidae        | <i>Crocidura heresae</i>           |                | Guinea         | DQ521043 |   | JQ732235    |   |
| Eulipotyphla | Soricidae        | <i>Sorex caecutiens</i>            |                | Japan          | KF974362 |   | MK410359    | * |
| Eulipotyphla | Soricidae        | <i>Sorex minutissimus</i>          |                | Japan          |          |   | MK410421    | * |
| Eulipotyphla | Soricidae        | <i>Sorex roboratus</i>             |                | Russia         | AB175128 |   | KY930906    |   |
| Eulipotyphla | Soricidae        | <i>Sorex tundrensis</i>            |                | Mongolia       |          |   | MK430030    | * |
| Eulipotyphla | Soricidae        | <i>Sorex cinereus</i>              |                | United States  | FJ667512 |   | JF443848    |   |
| Eulipotyphla | Soricidae        | <i>Sorex monticolus</i>            |                | Canada         | FJ667514 |   | JF436792    |   |
| Eulipotyphla | Soricidae        | <i>Sorex unguiculatus</i>          |                | Japan          |          |   | AB061527    |   |
| Eulipotyphla | Soricidae        | <i>Sorex cylindricauda</i>         |                | Nepal          | AB175121 |   |             |   |
| Eulipotyphla | Soricidae        | <i>Sorex isodon</i>                |                | China          | JX465364 |   |             |   |
| Eulipotyphla | Soricidae        | <i>Sorex araneus</i>               |                | Finland        | FJ667524 |   | KT210896    |   |
| Eulipotyphla | Soricidae        | <i>Sorex minutus</i>               |                | Czech Republic | GQ494310 |   |             |   |
| Eulipotyphla | Soricidae        | <i>Suncus murinus</i>              |                |                | DQ630386 |   | MK410374    | * |
| Eulipotyphla | Soricidae        | <i>Suncus etruscus</i>             |                | Iran           |          |   | MK410384    | * |
| Eulipotyphla | Soricidae        | <i>Neomys fodiens</i>              |                | Poland         | KC537797 |   | GU981249    |   |
| Eulipotyphla | Soricidae        | <i>Myosorex geata</i>              |                | Tanzania       | JX193701 |   |             |   |

|              |            |                                   |               |          |           |   |
|--------------|------------|-----------------------------------|---------------|----------|-----------|---|
| Eulipotyphla | Soricidae  | <i>Myosorex zinki</i>             | Tanzania      | JX193702 |           |   |
| Eulipotyphla | Talpidae   | <i>Dymecodon pilirostris</i>      | Japan         |          | MK410422  | * |
| Eulipotyphla | Talpidae   | <i>Urotrichus talpoides</i>       | Japan         | EU918371 | MK410354  | * |
| Eulipotyphla | Talpidae   | <i>Scalopus aquaticus</i>         | United States | HM461914 |           |   |
| Eulipotyphla | Talpidae   | <i>Talpa europaea</i>             | Hungary       | FJ715340 | Y19192    |   |
| Eulipotyphla | Talpidae   | <i>Neurotrichus gibbsii</i>       | United States | FJ595237 | JF435998  |   |
| Rodentia     | Muridae    | <i>Apodemus argenteus</i>         | Japan         |          | MK410423  | * |
| Rodentia     | Muridae    | <i>Apodemus agrarius</i>          | South Korea   | AB303225 | KY851941  |   |
| Rodentia     | Muridae    | <i>Apodemus speciosus</i>         | South Korea   | AB073811 | MK410366  | * |
| Rodentia     | Muridae    | <i>Apodemus flavicollis</i>       | Ukraine       | AY158451 |           |   |
| Rodentia     | Muridae    | <i>Apodemus peninsulae</i>        | South Korea   | AB073811 | KP671850  |   |
| Rodentia     | Muridae    | <i>Rattus norvegicus</i>          | China         | KY356141 | NC_001665 |   |
| Rodentia     | Muridae    | <i>Hylomyscus simus</i>           | Guinea        | DQ212188 | JQ667687  |   |
| Rodentia     | Muridae    | <i>Stenocephalemys albipes</i>    | Ethiopia      | AF518346 |           |   |
| Rodentia     | Muridae    | <i>Myodes glareolus</i>           |               | JX477304 | KM892824  |   |
| Rodentia     | Cricetidae | <i>Microtus pennsylvanicus</i>    | United States | AF119279 | KM189812  |   |
| Rodentia     | Cricetidae | <i>Microtus arvalis</i>           | Finland       | AY220770 | KP190310  |   |
| Rodentia     | Cricetidae | <i>Oligoryzomys longicaudatus</i> | Chile         | AF346566 |           |   |
| Rodentia     | Cricetidae | <i>Peromyscus maniculatus</i>     | United States | AF119261 | MH260579  |   |

\* This study
